# Supplementary material for: Current status of water-related planning for climate change adaptation in the Spree river basin, Germany
Source: Copernicus journal article supplement (doi:10.5194/nhess-24-4369-2024), 2024-12-05
Supplement: Supplementary file 1 [file nhess-24-4369-2024-supplement.pdf]

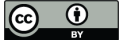

*Supplement of*

## **Current status of water-related planning for climate change adaptation in the Spree river basin, Germany**

**Saskia Arndt and Stefan Heiland**

*Correspondence to:* Saskia Arndt ([saskia.arndt@tu-berlin.de](mailto:saskia.arndt@tu-berlin.de))

The copyright of individual parts of the supplement might differ from the article licence.

**Figure S1. Analysed water management plans at the river basin level and their planning area.**

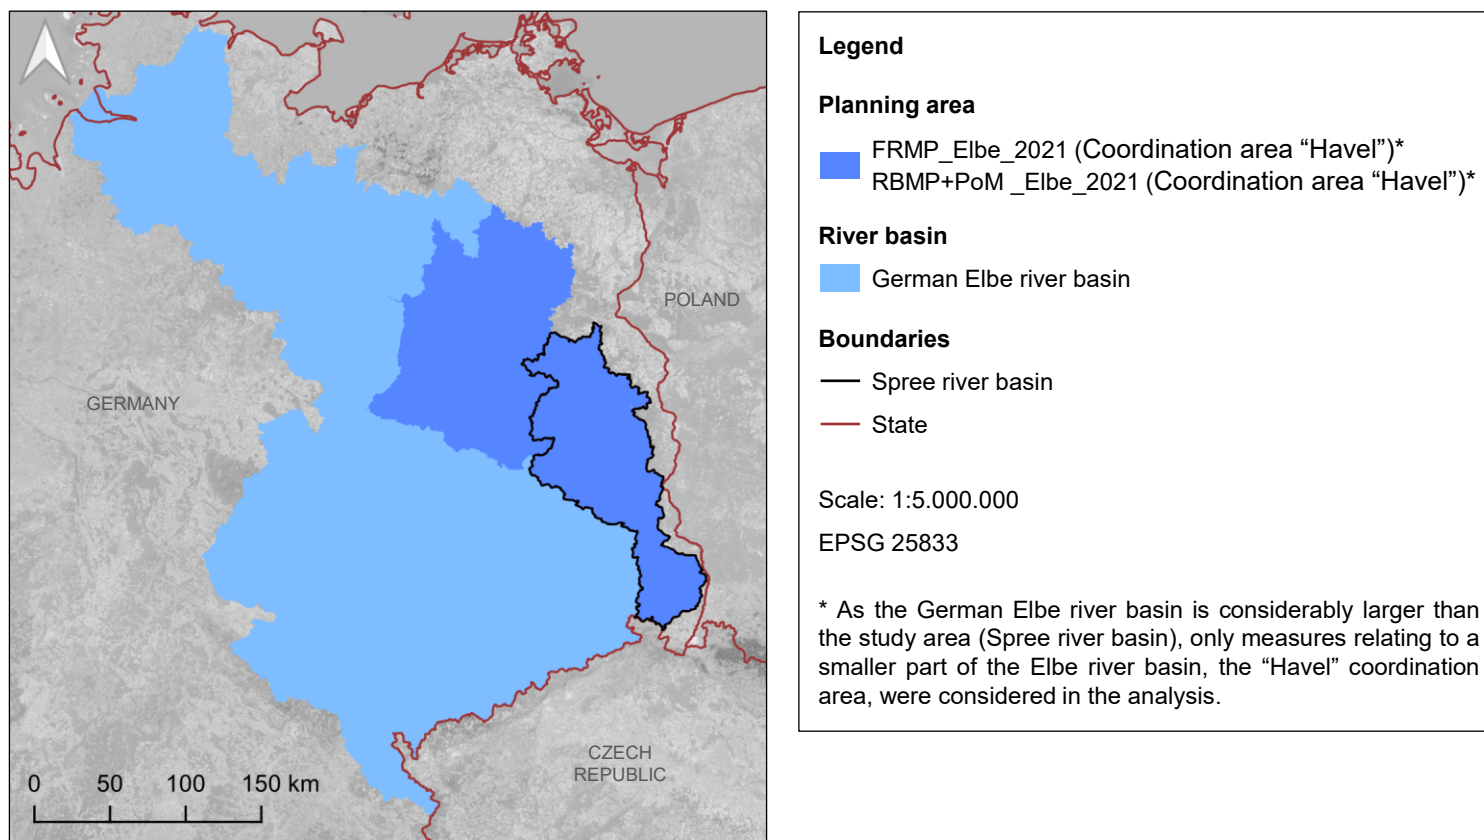

Plan abbreviations are composed of plan acronym, area allocation and publication date. Plan acronyms are FRMP (flood risk management plan), RBMP (river basin management plan) and PoM (programme of measures). Area allocation is the German Elbe River basin (Elbe). Map data acquired from © Esri, Maxar, Earthstar Geographics, and the GIS User Community (2024), EC/ESTAT/GISCO (2020) and WasserBLICK-/BfG & Zuständige Behörden der Länder (2016). For full map data references see Table S19 in the Supplement.

Figure S2. Analysed water management plans at the river sub-basin level and their planning area.

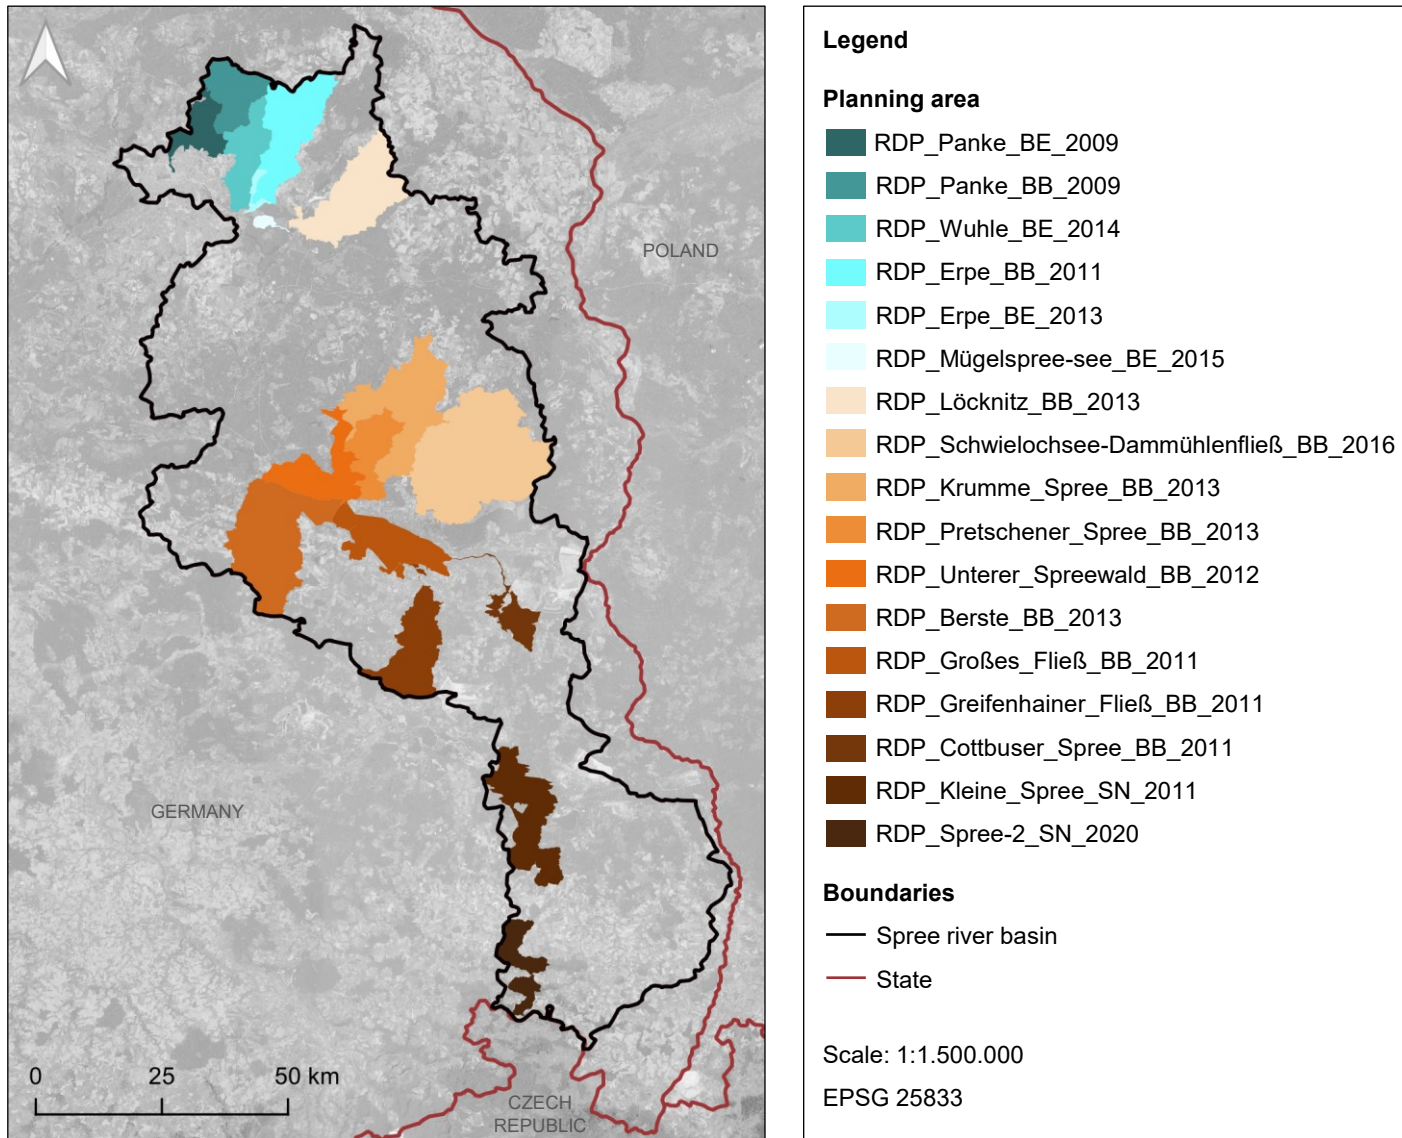

Plan abbreviations are composed of plan acronym, area allocation and publication date. Plan acronym is RDP (river development plan). Area allocations are Spree river sub-basins (divers) with federal state affiliation (BB for Brandenburg, BE for Berlin, SN for Saxony). Map data acquired from © Esri, Maxar, Earthstar Geographics, and the GIS User Community (2024), EC/ESTAT/GISCO (2020), WasserBLiCk-/BfG & Zuständige Behörden der Länder (2016), LfU (2014) and LfULG (2021). For full map data references see Table S19 in the Supplement.

**Figure S3. Analysed spatial and landscape plans at the federal state level and their planning area.**

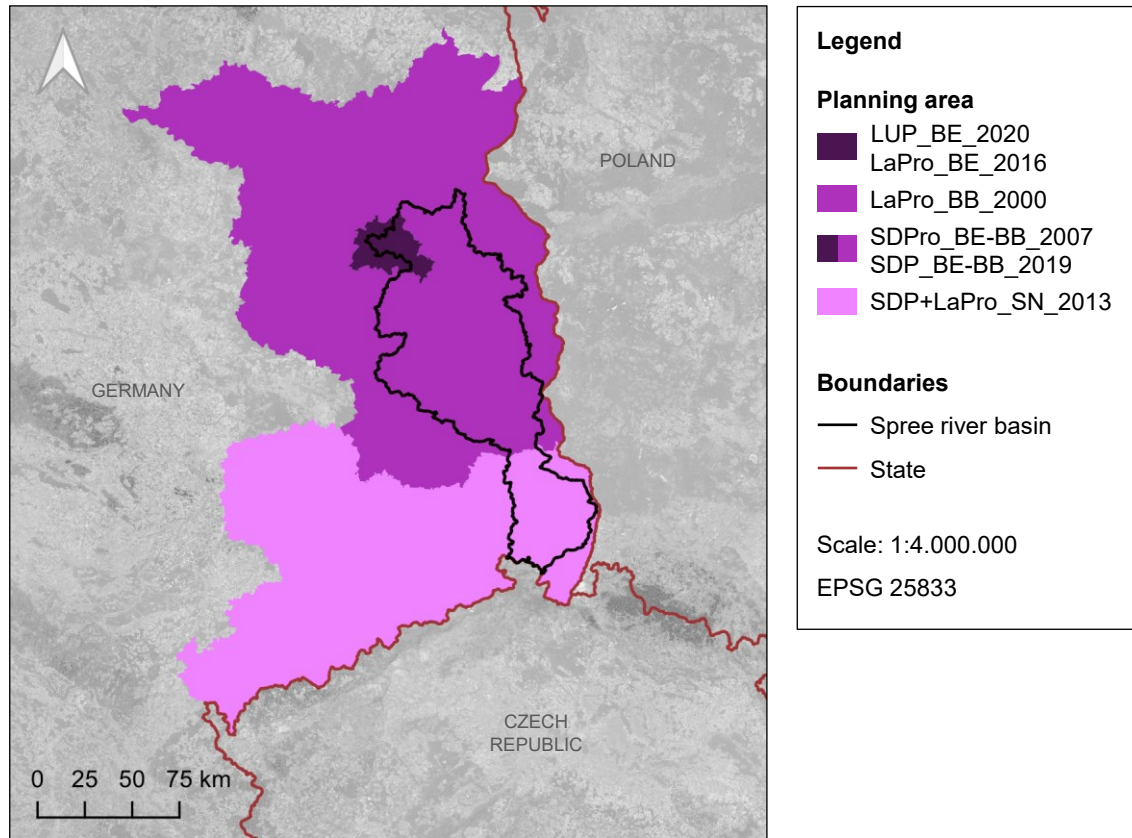

Plan abbreviations are composed of plan acronym, area allocation and publication date. Plan acronyms are SDPro (state development programme), SDP (state development plan), LUP (land use plan) and LaPro (landscape programme). Area allocations refer to their respective federal state. Map data acquired from © Esri, Maxar, Earthstar Geographics, and the GIS User Community (2024), EC/ESTAT/GISCO (2020), BKG (2009) and WasserBLiCK-/BfG & Zuständige Behörden der Länder (2016). For full map data references see Table S19 in the Supplement.

Figure S4. Analysed spatial and landscape plans at the district and region level and their planning area.

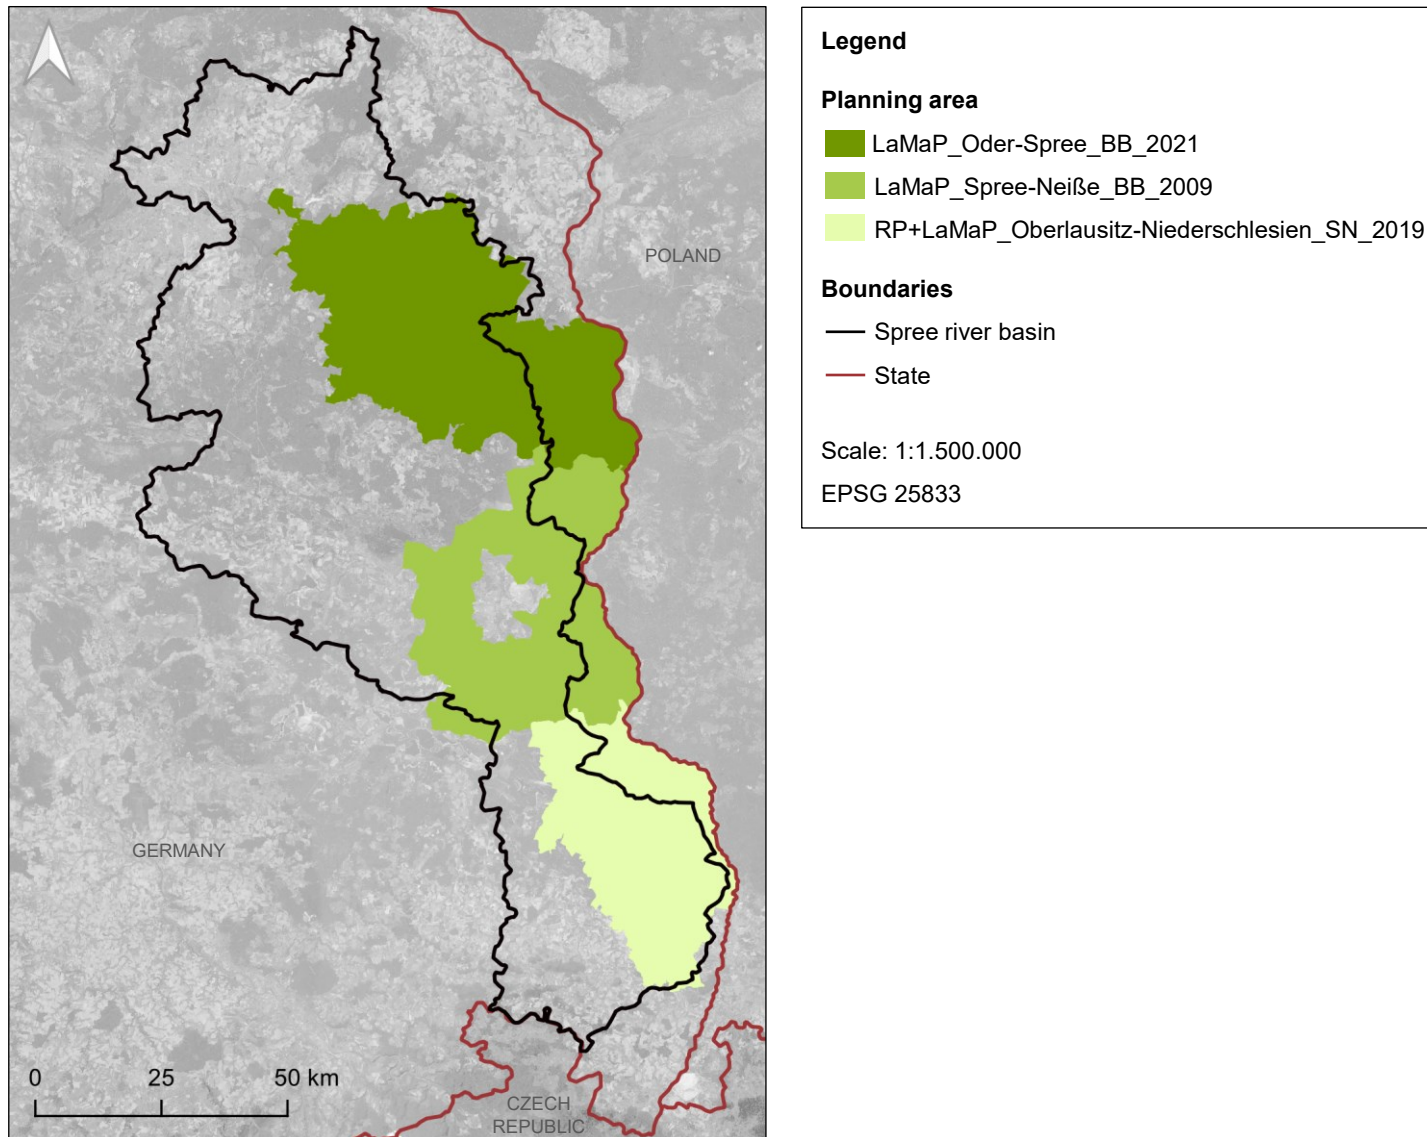

Plan abbreviations are composed of plan acronym, area allocation and publication date. Plan acronyms are RP (regional plan) and LaMaP (landscape master plan). Area allocations refer to their respective region/county with federal state affiliation. Map data acquired from © Esri, Maxar, Earthstar Geographics, and the GIS User Community (2024), EC/ESTAT/GISCO (2020), BKG (2009) and WasserBLiCk-/BfG & Zuständige Behörden der Länder (2016). For full map data references see Table S19 in the Supplement.

**Figure S5. Consideration of climate change (CC), its impacts (CCI) and adaptation (CCA) in plans covering the Spree river basin by year of publication from 2000-2021 ( $N = 28$ ).**

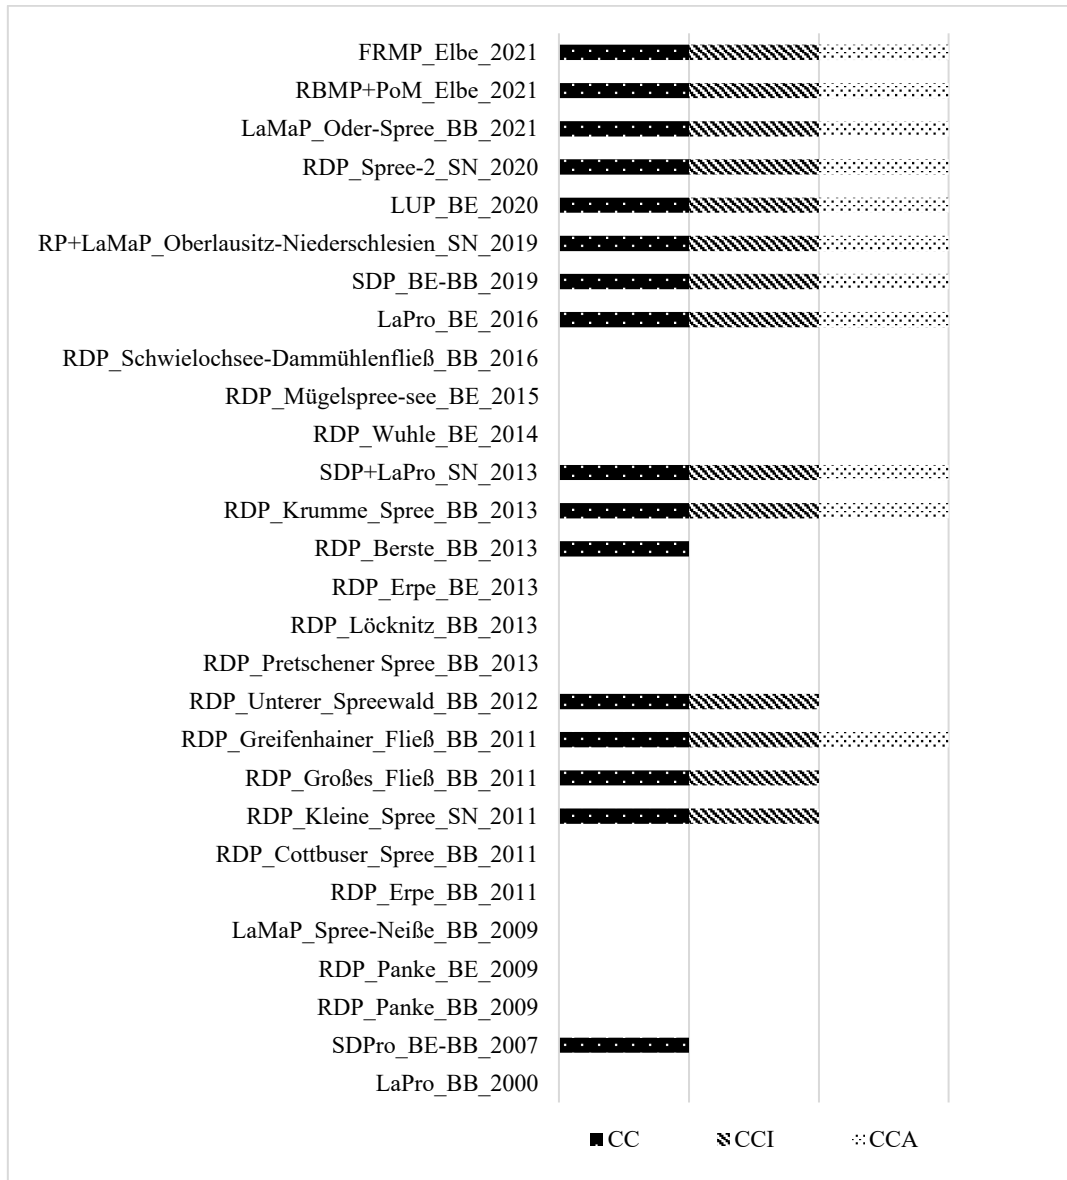

Plan abbreviations are composed of plan acronym, area allocation and publication date. Plan acronyms are FRMP (flood risk management plan), RBMP (river basin management plan), PoM (programme of measures), RDP (river development plan), SDPro (state development programme), SDP (state development plan), RP (regional plan), LUP (land use plan), LaPro (landscape programme) and LaMaP (landscape master plan). Area allocations for water management plans are the German Elbe River basin (Elbe) or Spree River sub-basins (divers) with federal state affiliation (BB for Brandenburg, BE for Berlin, SN for Saxony). Area allocations for spatial and landscape plans refer to their respective administrative levels, either labelled with the federal state or the region/county with federal state affiliation.



**Table S1. Water management field of action “Low water management”: Overview of climate change adaptation measures and potential actions. Adopted from the Climate Change Report (LAWA, 2020; Appendix II, p. 106-113).**

| <b>Climate change adaptation measures</b> | <b>Actions (Selection)</b>                                                                                                                                                                                                                                                                                                                                                                                                                                  |
|-------------------------------------------|-------------------------------------------------------------------------------------------------------------------------------------------------------------------------------------------------------------------------------------------------------------------------------------------------------------------------------------------------------------------------------------------------------------------------------------------------------------|
| Low water and temperature forecasting     | <ul style="list-style-type: none"> <li>- Adapting the monitoring network and gauges to low water levels</li> <li>- Reinforcing monitoring during low water phases</li> <li>- Developing and expanding forecasting models</li> <li>- Including water temperature and other water quality parameters in the models</li> <li>- Developing worst-case forecasts</li> </ul>                                                                                      |
| Water use restrictions                    | <ul style="list-style-type: none"> <li>- Restrictions on owner, neighbour and public use of surface waters</li> <li>- Restrictions on service water abstraction for the public (e.g., for watering gardens, washing cars)</li> <li>- Regulations on abstraction for agricultural use</li> <li>- Restrictions on recreational use (e.g., kayaking)</li> <li>- Targeted communication of restrictions</li> <li>- Adaptation of water law decisions</li> </ul> |
| Ensuring water quality                    | <ul style="list-style-type: none"> <li>- Reducing nutrient and pollutant inputs</li> <li>- Reducing cooling water withdrawals and discharges</li> <li>- Shading from woody vegetation on watercourse banks</li> <li>- Aeration</li> <li>- Dismantling of impoundments</li> <li>- Low water elevation</li> </ul>                                                                                                                                             |
| Oxygen management through aeration        | <ul style="list-style-type: none"> <li>- Turbine aeration</li> <li>- Aeration using weir overfall, sprinkler irrigation via cascades</li> <li>- Introduction of technical oxygen</li> <li>- Monitoring of discharge, water temperature, and oxygen content</li> </ul>                                                                                                                                                                                       |
| Artificial raising of low water levels    | <ul style="list-style-type: none"> <li>- New construction or expansion of water reservoirs and dams</li> <li>- Optimised management of multifunctional existing reservoirs</li> <li>- Transfers from neighbouring catchment areas</li> </ul>                                                                                                                                                                                                                |
| Creating artificial water reservoirs      | <ul style="list-style-type: none"> <li>- Retention basins with permanent reservoirs</li> <li>- Dams</li> </ul>                                                                                                                                                                                                                                                                                                                                              |
| Promoting natural water retention         | <ul style="list-style-type: none"> <li>- Providing floodplains</li> <li>- Rewetting of wetlands</li> <li>- Restoring near-natural habitats</li> <li>- Adapting land management</li> <li>- Increasing the proportion of green spaces, reducing sealing</li> <li>- Improving the water storage capacity of the soil</li> </ul>                                                                                                                                |

**Table S2. Water management field of action “Groundwater protection and use”: Overview of climate change adaptation measures and potential actions. Adopted from the Climate Change Report (LAWA, 2020; Appendix II, p. 61-67).**

| <b>Climate change adaptation measures</b>                            | <b>Actions (Selection)</b>                                                                                                                                                                                                                                                                                                                                                              |
|----------------------------------------------------------------------|-----------------------------------------------------------------------------------------------------------------------------------------------------------------------------------------------------------------------------------------------------------------------------------------------------------------------------------------------------------------------------------------|
| Climate-specific evaluation and adaptation of groundwater monitoring | <ul style="list-style-type: none"> <li>- Maintaining and expanding groundwater monitoring (networks)</li> <li>- Increasing the recording of groundwater temperatures and possibly other parameters not previously focussed on (e.g., groundwater fauna) as part of groundwater monitoring</li> </ul>                                                                                    |
| Promoting groundwater-friendly agriculture (quality and quantity)    | <ul style="list-style-type: none"> <li>- Compliance with the requirements of the Fertiliser Ordinance</li> <li>- Promoting organic agriculture</li> <li>- Precision Farming</li> <li>- Fast-growing plants as catch/winter crop</li> <li>- Groundwater management planning in agricultural areas</li> <li>- Change of use</li> </ul>                                                    |
| Land use changes                                                     | <ul style="list-style-type: none"> <li>- Organic agriculture</li> <li>- Converting arable land to grassland or forest</li> <li>- Converting intensive grassland to extensive grassland</li> <li>- Afforestation</li> </ul>                                                                                                                                                              |
| Protecting groundwater-dependent terrestrial ecosystems (peatlands)  | <ul style="list-style-type: none"> <li>- Rewetting of drained peatlands</li> <li>- Designation of peatlands as nature reserves</li> <li>- Alternative uses for peatlands (e.g., paludiculture)</li> <li>- Site-appropriate land use (grassland use) for mineral groundwater soils</li> <li>- Cessation of agricultural use of peatlands</li> </ul>                                      |
| Promoting groundwater recharge                                       | <ul style="list-style-type: none"> <li>- Rewetting of wetlands</li> <li>- Restoration of near-natural water structures</li> <li>- Forest restructuring to an increased share of deciduous trees</li> <li>- Reducing land sealing</li> <li>- Increasing the share of green spaces</li> <li>- Exploitation of infiltration potentials</li> <li>- Conservative soil cultivation</li> </ul> |
| Increasing groundwater supply                                        | <ul style="list-style-type: none"> <li>- Artificial infiltration of surface water treated for drinking water in infiltration systems</li> <li>- Management with consideration of climate change impacts</li> </ul>                                                                                                                                                                      |
| Sustainable groundwater management                                   | <ul style="list-style-type: none"> <li>- Groundwater level-dependent control of groundwater extractions</li> <li>- Determination of local groundwater levels that may not be undercut</li> <li>- Tying water rights to the requirement of groundwater monitoring</li> </ul>                                                                                                             |



**Table S3. Water management field of action “Public water supply”: Overview of climate change adaptation measures and potential actions. Adopted from the Climate Change Report (LAWA, 2020; Appendix II, p. 68-75).**

| <b>Climate change adaptation measures</b>       | <b>Actions (Selection)</b>                                                                                                                                                                                                                                                                                                                                                                                                      |
|-------------------------------------------------|---------------------------------------------------------------------------------------------------------------------------------------------------------------------------------------------------------------------------------------------------------------------------------------------------------------------------------------------------------------------------------------------------------------------------------|
| Redundant water harvesting systems              | <ul style="list-style-type: none"> <li>- Developing additional raw water sources</li> <li>- Expanding regional and supra-regional network solutions (group suppliers, special-purpose associations, long-distance suppliers)</li> </ul>                                                                                                                                                                                         |
| Adapting water supply infrastructure            | <ul style="list-style-type: none"> <li>- Optimising existing water supply systems (e.g., deeper wells, more efficient pump systems and water extraction systems at dams)</li> <li>- Constructing Redundant water harvesting systems</li> <li>- Creating larger storage capacities in water networks and waterworks</li> <li>- Securing further water extraction options through comprehensive groundwater protection</li> </ul> |
| Rainwater harvesting                            | <ul style="list-style-type: none"> <li>- Collecting and storing of rainwater in rain barrels, underground cisterns, ponds, etc.</li> </ul>                                                                                                                                                                                                                                                                                      |
| Reducing water demand                           | <ul style="list-style-type: none"> <li>- Restricting water use (e.g., for irrigation, car washing) during dry periods</li> <li>- Rainwater harvesting</li> <li>- Reusing service water</li> <li>- Steering through drinking water pricing</li> </ul>                                                                                                                                                                            |
| Improving water quality in the pipeline network | <ul style="list-style-type: none"> <li>- Adjusting network flushing</li> <li>- Regular draining of water from network end sections</li> <li>- Post-disinfection during storage and distribution</li> <li>- Reducing heating, e.g., by unsealing overlying surfaces, greater installation depths or insulating the pipes</li> </ul>                                                                                              |
| Advanced drinking water treatment               | <ul style="list-style-type: none"> <li>- Reducing nutrients</li> <li>- Disinfecting</li> <li>- Diluting with less contaminated water</li> <li>- Removing particles through e.g., filtration, flocculation, membrane filtration</li> </ul>                                                                                                                                                                                       |
| Comprehensive water supply management           | <ul style="list-style-type: none"> <li>- Regional or nationwide water supply management based on prioritising water supply</li> <li>- Prioritising drinking water supply in the event of uncertain power supply</li> <li>- Climate change-orientated water supply planning</li> <li>- Adapted reservoir management</li> </ul>                                                                                                   |

**Table S4. Water management field of action “Agricultural irrigation”: Overview of climate change adaptation measures and potential actions. Adopted from the Climate Change Report (LAWA, 2020; Appendix II, p. 92-99).**

| <b>Climate change adaptation measures</b> | <b>Actions (Selection)</b>                                                                                                                                                                                                                                                                                                                                                                                                                                                                                    |
|-------------------------------------------|---------------------------------------------------------------------------------------------------------------------------------------------------------------------------------------------------------------------------------------------------------------------------------------------------------------------------------------------------------------------------------------------------------------------------------------------------------------------------------------------------------------|
| Soil and erosion protection               | <ul style="list-style-type: none"> <li>- Expanding crop rotation</li> <li>- Avoiding cultivation of root crops</li> <li>- Cultivating catch crops</li> <li>- Avoiding soil compaction (fewer ruts, wider tyres)</li> <li>- Avoiding trampling damage and overgrazing</li> <li>- Utilising grassland in areas at high risk of erosion</li> <li>- Accumulating humus layer</li> <li>- Conserving soil cultivation</li> </ul>                                                                                    |
| Conservation tillage                      | <ul style="list-style-type: none"> <li>- Non-turning and plough less tillage</li> <li>- Minimal tillage</li> <li>- Strip-tillage</li> </ul>                                                                                                                                                                                                                                                                                                                                                                   |
| Humus accumulation                        | <ul style="list-style-type: none"> <li>- Leaving crop residues on the field</li> <li>- Using organic fertiliser</li> <li>- Cultivating catch and nurse crops (e.g., legumes)</li> <li>- Using no-tillage and mulch seeding methods</li> <li>- Conserving soil cultivation</li> <li>- Preserving the natural soil water balance and avoiding drainage</li> </ul>                                                                                                                                               |
| Adaptations in cultivation                | <ul style="list-style-type: none"> <li>- Choosing drought-tolerant crops</li> <li>- Choosing crops that require the most water outside the summer months</li> <li>- Cultivating winter crops</li> <li>- Avoiding large-scale cultivation of erosion-promoting crops (e.g., maize, beetroot)</li> <li>- Alternating cultivation of different crops in strips</li> <li>- Shading (e.g., through agroforestry systems or by installing solar panels)</li> <li>- Adapting seeding and harvesting dates</li> </ul> |
| Efficient irrigation                      | <ul style="list-style-type: none"> <li>- Drip irrigation</li> <li>- Demand-orientated irrigation control</li> <li>- Precision Irrigation</li> </ul>                                                                                                                                                                                                                                                                                                                                                           |
| Groundwater substitution                  | <ul style="list-style-type: none"> <li>- Utilising water from surface waters</li> <li>- Rainwater utilisation (storing winter precipitation, e.g., in ponds)</li> <li>- Water storage systems (e.g., under swards of field boundaries, under parts of the cultivated area or yard area)</li> </ul>                                                                                                                                                                                                            |

**Table S5. Water management field of action “Water ecosystem protection”: Overview of climate change adaptation measures and potential actions. Adopted from the Climate Change Report (LAWA, 2020; Appendix II, p. 51-60).**

| Climate change adaptation measures                                 | Actions (Selection)                                                                                                                                                                                                                                                                                                                                                                                                                                                               |
|--------------------------------------------------------------------|-----------------------------------------------------------------------------------------------------------------------------------------------------------------------------------------------------------------------------------------------------------------------------------------------------------------------------------------------------------------------------------------------------------------------------------------------------------------------------------|
| Improving continuity of flowing waters                             | <ul style="list-style-type: none"> <li>- Constructing passable structures</li> <li>- Dismantling/rebuilding transverse structures</li> <li>- Optimising control of culvert structures</li> </ul>                                                                                                                                                                                                                                                                                  |
| Variation of hydromorphological structures                         | <ul style="list-style-type: none"> <li>- Removing bed and bank stabilisation</li> <li>- Installing flow deflectors</li> <li>- Widening watercourse channel</li> <li>- Inserting boulders and deadwood</li> <li>- Rewetting floodplains and wetlands</li> </ul>                                                                                                                                                                                                                    |
| Protecting and developing riparian strips                          | <ul style="list-style-type: none"> <li>- Planting and developing riparian woodland</li> <li>- Structuring wooded edges</li> <li>- Planting reeds</li> <li>- Creating riparian strips on farmland</li> </ul>                                                                                                                                                                                                                                                                       |
| Installing sedimentation barriers                                  | <ul style="list-style-type: none"> <li>- Greening riparian strips</li> <li>- Creating structures for sedimentation in riparian and floodplain areas</li> </ul>                                                                                                                                                                                                                                                                                                                    |
| Nature-conserving watercourse maintenance                          | <ul style="list-style-type: none"> <li>- Removal of washed-in, deposited material</li> <li>- Leaving mowed and cleared material on the bank for 1-2 days, allowing small animals to escape</li> <li>- Restrict clearing times to September and October (considering spawning and bird breeding seasons as well as main periods of plant and insect development)</li> <li>- Avoiding bed desilting during frost periods (many organisms hibernate in the mud)</li> </ul>           |
| Conservation and expansion of protected areas and biotope networks | <ul style="list-style-type: none"> <li>- Special Areas of Conservation (SACs) under the Habitats Directive, where water-dependent habitat types should be conserved</li> <li>- Water protection areas</li> </ul>                                                                                                                                                                                                                                                                  |
| Reducing diffuse pollutant entry and nutrient inputs               | <ul style="list-style-type: none"> <li>- Promoting organic farming</li> <li>- Implementing conservation tillage, using mulching methods</li> <li>- Optimising the use of fertilisers and pesticides</li> <li>- Creating and developing wide riparian strips</li> <li>- Forest protection and afforestation</li> <li>- Peatland protection</li> </ul>                                                                                                                              |
| Adapting abstraction and discharge threshold values                | <ul style="list-style-type: none"> <li>- Considering climate change when issuing water law authorisations for water withdrawals from and discharges into water bodies</li> <li>- Determining minimum water discharges for power plant discharges, taking future climatic developments into account</li> </ul>                                                                                                                                                                     |
| Water quality warning service                                      | <ul style="list-style-type: none"> <li>- Introducing a public reporting system with different reporting stages, which is used at certain threshold values for water temperature and other parameters: <ul style="list-style-type: none"> <li>- Pre-warning stage (critical temperatures to be expected soon)</li> <li>- Warning stage (critical conditions in the water body)</li> <li>- Alarm stage (significant impact on water biology, including fish)</li> </ul> </li> </ul> |
| Climate-specific adaptation and evaluation of water monitoring     | <ul style="list-style-type: none"> <li>- Monitoring of particularly affected water bodies</li> <li>- Evaluating previous developments</li> </ul>                                                                                                                                                                                                                                                                                                                                  |

**Table S6. Water management field of action “Flood protection during heavy rain”: Overview of climate change adaptation measures and potential actions. Adopted from the Climate Change Report (LAWA, 2020; Appendix II, p. 32-42).**

| <b>Climate change adaptation measures</b>                                                | <b>Actions (Selection)</b>                                                                                                                                                                                                                                                                                                                                                                                        |
|------------------------------------------------------------------------------------------|-------------------------------------------------------------------------------------------------------------------------------------------------------------------------------------------------------------------------------------------------------------------------------------------------------------------------------------------------------------------------------------------------------------------|
| Retention through changes in forest management                                           | <ul style="list-style-type: none"> <li>- Reforestation</li> <li>- Forest restructuring towards more deciduous trees</li> </ul>                                                                                                                                                                                                                                                                                    |
| Establishing and securing emergency waterways                                            | <ul style="list-style-type: none"> <li>- Equipping road areas with raised kerbs or ground-level gutters</li> <li>- Providing gutters in garden areas</li> <li>- No new building constructions in water drainage paths</li> </ul>                                                                                                                                                                                  |
| Object protection in case of flood risk                                                  | <ul style="list-style-type: none"> <li>- Installing water barriers outside buildings (e.g., thresholds, walls)</li> <li>- Waterproofing on buildings</li> <li>- Providing protective gates at yard entrances</li> <li>- Providing basements with floor drains</li> <li>- No storage of water-polluting substances in flood-prone areas (e.g., oil tanks)</li> </ul>                                               |
| Organised measures in case of extreme rainfall and flash flooding events                 | <ul style="list-style-type: none"> <li>- Emergency strategies for transport and supply infrastructure</li> <li>- Flood alarm and operational planning</li> <li>- Coordination and cooperation with neighbouring fire services</li> <li>- Improved early warning of affected areas</li> <li>- Mobile warning systems</li> </ul>                                                                                    |
| Behavioural precautions and training in the event of extreme rainfall and flash flooding | <ul style="list-style-type: none"> <li>- Including climate change-specific topics in school and training curricula</li> <li>- Training courses</li> <li>- Information events</li> <li>- Fact sheets and guidelines</li> <li>- Raising awareness, especially in so-called “dormant” waters</li> <li>- Advising local authorities (e.g., flood audits)</li> <li>- Support programmes for self-prevention</li> </ul> |
| Regular maintenance and inspection of the drainage systems                               | <ul style="list-style-type: none"> <li>- Using spatial rakes (sediment traps)</li> <li>- Carrying out water inspections</li> <li>- Calling on the public to report blockages</li> <li>- Removing sediment accumulations and plant growth</li> </ul>                                                                                                                                                               |
| Flood risk assessment (e.g., heavy rain hazard and risk maps)                            | <ul style="list-style-type: none"> <li>- Creating local heavy rain hazard and risk maps</li> <li>- Analysing heavy rain hazard and risk maps</li> <li>- More detailed analyses with site inspections, local surveys and interviews in areas at risk</li> </ul>                                                                                                                                                    |

**Table S7. Water management field of action “Inland flood protection”: Overview of climate change adaptation measures and potential actions. Adopted from the Climate Change Report (LAWA, 2020; Appendix II, p. 5-16).**

| Climate change adaptation measures                                           | Actions (Selection)                                                                                                                                                                                                                                                                                                                                                                                           |
|------------------------------------------------------------------------------|---------------------------------------------------------------------------------------------------------------------------------------------------------------------------------------------------------------------------------------------------------------------------------------------------------------------------------------------------------------------------------------------------------------|
| Technical flood protection                                                   | <ul style="list-style-type: none"> <li>- Designating floodplains</li> <li>- Raising or reinforcing dykes, dams, terps, flood defence walls</li> <li>- Installing mobile flood defences (sandbags, dam beams, protective walls)</li> <li>- Adapting or building new dams (reservoirs, flood retention basins)</li> </ul>                                                                                       |
| Recovery of flood plains and renaturation of floodplains                     | <ul style="list-style-type: none"> <li>- Reconnecting terrain structures with retention potential (e.g., cut-off meander)</li> <li>- Dismantling of dykes and dams</li> <li>- Removing bank stabilisation</li> <li>- Raising of river bed</li> </ul>                                                                                                                                                          |
| Activating additional and optimising existing retention areas                | <ul style="list-style-type: none"> <li>- Constructing flood retention basins and polders</li> <li>- Restoring and reconnecting floodplains</li> <li>- Installing a control system for existing flood polders</li> <li>- Emptying existing reservoirs before a flood event occurs</li> </ul>                                                                                                                   |
| Land use regulations in flood plains/areas at risk of flooding               | <ul style="list-style-type: none"> <li>- Flood-adapted planning, building and renovating</li> <li>- No designation of development areas</li> <li>- Amending or updating urban land-use plans</li> <li>- Removing or dismantling flood-sensitive uses</li> <li>- Adapting agricultural cultivation (e.g., grassland)</li> </ul>                                                                                |
| Designation of <i>Vorranggebiet</i> and <i>Vorbehaltsgebieten</i>            | <ul style="list-style-type: none"> <li>- Designation of <i>Vorranggebiet</i> and <i>Vorbehaltsgebieten</i> for preventive flood protection in state and regional plans for keeping areas free for, e.g., dyke relocation or flood retention basins</li> </ul>                                                                                                                                                 |
| Flood hazard and risk maps                                                   | <ul style="list-style-type: none"> <li>- Creating flood hazard maps in accordance with the Floods Directive</li> <li>- Referring to flood hazard maps when drawing up flood risk maps for the environment, health, economic activities and cultural assets as well as planning and optimising precautionary measures</li> </ul>                                                                               |
| Identifying and mapping areas at risk of waterlogging (groundwater)          | <ul style="list-style-type: none"> <li>- Providing basic data and maps</li> <li>- Information platform on current groundwater conditions and maximum groundwater levels</li> <li>- Information and advice on waterlogging problems and solutions</li> </ul>                                                                                                                                                   |
| Property protection in the event of damaging high groundwater levels         | <ul style="list-style-type: none"> <li>- Waterproofing of the house wall</li> <li>- New buildings without basement</li> </ul>                                                                                                                                                                                                                                                                                 |
| Flood partnerships                                                           | <ul style="list-style-type: none"> <li>- Association of municipalities, specialised administrations and institutions within a river basin to strengthen flood hazard awareness, to pass on experience in prevention and to establish networks of responsible institutions</li> </ul>                                                                                                                          |
| Organised measures in case of an extreme inland flooding event               | <ul style="list-style-type: none"> <li>- Emergency strategies for transport and supply infrastructure</li> <li>- Flood alarm and operational planning</li> <li>- Coordination and cooperation with neighbouring fire services</li> <li>- Improved early warning of affected areas</li> <li>- Mobile warning systems</li> </ul>                                                                                |
| Behavioural precautions and training in the event of extreme inland flooding | <ul style="list-style-type: none"> <li>- Including climate change-specific topics in school and training curricula</li> <li>- Training courses</li> <li>- Information events</li> <li>- Fact sheets and guidelines</li> <li>- Flood markers that remind people of past flood events</li> <li>- Advice for local authorities (e.g., flood audits)</li> <li>- Support programmes for self-prevention</li> </ul> |

**Table S8. Water management field of action “Urban drainage and wastewater treatment”: Overview of climate change adaptation measures and potential actions. Adopted from the Climate Change Report (LAWA, 2020; Appendix II, p. 25-31).**

| <b>Climate change adaptation measures</b>                           | <b>Actions (Selection)</b>                                                                                                                                                                                                                                                                                                                                                                                                                                                                                                                                                                                                                                                                                                                        |
|---------------------------------------------------------------------|---------------------------------------------------------------------------------------------------------------------------------------------------------------------------------------------------------------------------------------------------------------------------------------------------------------------------------------------------------------------------------------------------------------------------------------------------------------------------------------------------------------------------------------------------------------------------------------------------------------------------------------------------------------------------------------------------------------------------------------------------|
| Optimising the construction and operation of existing sewer systems | <ul style="list-style-type: none"> <li>- For low flow rates:               <ul style="list-style-type: none"> <li>- Needs-based flushing (possibly high-pressure flushing and use of chemicals or machines)</li> </ul> </li> <li>- For minimising the combined wastewater discharge:               <ul style="list-style-type: none"> <li>- Network control</li> <li>- Sewer network control</li> <li>- Measures for urban rainwater management</li> </ul> </li> </ul>                                                                                                                                                                                                                                                                            |
| Adapting wastewater treatment operations                            | <ul style="list-style-type: none"> <li>- Aeration tank settling</li> <li>- Optimising secondary clarification</li> <li>- Flocculant addition</li> </ul>                                                                                                                                                                                                                                                                                                                                                                                                                                                                                                                                                                                           |
| Installations for precipitation water treatment                     | <ul style="list-style-type: none"> <li>- Centralised:               <ul style="list-style-type: none"> <li>- Rain clarifier</li> <li>- Reed lamella sedimentation</li> <li>- Retention soil filter basin</li> </ul> </li> <li>- Decentralised:               <ul style="list-style-type: none"> <li>- Sedimentation shaft, pipe, channel, basin</li> <li>- Infiltration (with special filter material)</li> <li>- Swamp plant roof</li> </ul> </li> </ul>                                                                                                                                                                                                                                                                                         |
| Water retention in urban areas                                      | <ul style="list-style-type: none"> <li>- Centralised:               <ul style="list-style-type: none"> <li>- Stormwater overflow basin for intermediate storage of combined sewage</li> <li>- Rainwater retention basins and cisterns for the storage and utilisation of rainwater</li> </ul> </li> <li>- Decentralised:               <ul style="list-style-type: none"> <li>- Multifunctional areas that can be used for water retention (e.g., streets, car parks, playgrounds)</li> <li>- Green roofs, roof gardens</li> <li>- Green spaces (e.g., unpaved tram lines as grass tracks, roadside lawns, trees, parks)</li> <li>- Extending inner-city woodland areas</li> <li>- Water areas</li> <li>- Green-blue roofs</li> </ul> </li> </ul> |
| Exploiting infiltration potentials                                  | <ul style="list-style-type: none"> <li>- Constructing infiltration systems, infiltration swales, swale-trench systems</li> <li>- Unsealing</li> <li>- Using water-permeable coverings (e.g., gravel, drainage asphalt coverings)</li> <li>- Improving the infiltration potential (e.g., use of ground-covering vegetation)</li> <li>- Avoiding soil compaction in green spaces</li> </ul>                                                                                                                                                                                                                                                                                                                                                         |
| Incentives for rainwater management                                 | <ul style="list-style-type: none"> <li>- Implementing the priority of decentralised rainwater management in accordance with the Federal Water Act (<i>Wasserhaushaltsgesetz</i>, WHG) Section 55 (2)</li> <li>- Specifications in local authority drainage regulations</li> <li>- Split wastewater charges (separate charges for the disposal of wastewater and rainwater)</li> <li>- Promoting green roofs</li> </ul>                                                                                                                                                                                                                                                                                                                            |
| Protecting wastewater facilities from floods                        | <ul style="list-style-type: none"> <li>- Dyking the facilities</li> <li>- Examining of raising buildings</li> <li>- Flood-proof construction of mechanical and electro-technical plant components</li> </ul>                                                                                                                                                                                                                                                                                                                                                                                                                                                                                                                                      |

**Table S9. Consideration of climate change impacts in plans covering the Spree river basin ( $n = 14$ ).**

| Scope                                                      | Plan abbreviations<br>(plan acronym, area allocation,<br>publication date) | Climate change impacts                                    |                                                     |                                  |
|------------------------------------------------------------|----------------------------------------------------------------------------|-----------------------------------------------------------|-----------------------------------------------------|----------------------------------|
|                                                            |                                                                            | Increasing low water events /<br>Decrease in water supply | Increasing heavy rainfall<br>events and/or flooding | Deterioration<br>of water status |
| Water<br>management<br>(according to<br>the WFD and<br>FD) | FRMP_Elbe_2021                                                             |                                                           | 1                                                   |                                  |
|                                                            | RBMP+PoM_Elbe_2021                                                         | 1                                                         | 1                                                   | 1                                |
|                                                            | RDP_Greifenhainer_Fließ_BB_2011                                            | 1                                                         |                                                     |                                  |
|                                                            | RDP_Großes_Fließ_BB_2011                                                   | 1                                                         |                                                     |                                  |
|                                                            | RDP_Kleine_Spree_SN_2011                                                   | 1                                                         |                                                     |                                  |
|                                                            | RDP_Krumme_Spree_BB_2013                                                   | 1                                                         |                                                     |                                  |
|                                                            | RDP_Spree-2_SN_2020                                                        | 1                                                         |                                                     | 1                                |
|                                                            | RDP_Unterer_Spreewald_BB_2012                                              | 1                                                         |                                                     |                                  |
| Spatial<br>planning                                        | SDP_BE-BB_2019                                                             | 1                                                         | 1                                                   |                                  |
|                                                            | SDP+LaPro_SN_2013                                                          | 1                                                         | 1                                                   | 1                                |
|                                                            | RP+LaMaP_Oberlausitz-<br>Niederschlesien_SN_2019                           | 1                                                         | 1                                                   | 1                                |
|                                                            | LUP_BE_2020                                                                |                                                           | 1                                                   |                                  |
| Landscape<br>planning                                      | LaPro_BE_2016                                                              | 1                                                         |                                                     |                                  |
|                                                            | LaMaP_Oder-Spree_BB_2021                                                   | 1                                                         | 1                                                   | 1                                |
|                                                            |                                                                            | <b>12</b>                                                 | <b>7</b>                                            | <b>5</b>                         |

Plan abbreviations are composed of plan acronym, area allocation and publication date. Plan acronyms are FRMP (flood risk management plan), RBMP (river basin management plan), PoM (programme of measures), RDP (river development plan), SDPro (state development programme), SDP (state development plan), RP (regional plan), LUP (land use plan), LaPro (landscape programme) and LaMaP (landscape master plan). Area allocations for water management plans are the German Elbe River basin (Elbe) or Spree River sub-basins (divers) with federal state affiliation (BB for Brandenburg, BE for Berlin, SN for Saxony). Area allocations for spatial and landscape plans refer to their respective administrative levels, either labelled with the federal state or the region/county with federal state affiliation.



**Table S10. Overall analysis of the consideration of climate change adaptation in water-related planning for each water management field of action adopted from the Climate Change Report by the LAWA from 2020 (n = 11; 1 = climate change adaptation measure concerning the water management field of action is proposed by the plan)**

| Scope              | Plan abbreviations*<br>(plan acronym, area allocation, publication date) | Water management fields of action |                                       |                            |                                |                                   |                                           |                                |                                                | Total consideration of water management fields of action per plan |
|--------------------|--------------------------------------------------------------------------|-----------------------------------|---------------------------------------|----------------------------|--------------------------------|-----------------------------------|-------------------------------------------|--------------------------------|------------------------------------------------|-------------------------------------------------------------------|
|                    |                                                                          | (a)<br>Low water management       | (b)<br>Groundwater protection and use | (c)<br>Public water supply | (d)<br>Agricultural irrigation | (e)<br>Water ecosystem protection | (f)<br>Flood protection during heavy rain | (g)<br>Inland flood protection | (h)<br>Urban drainage and wastewater treatment |                                                                   |
| Water management   | FRMP_Elbe_2021                                                           |                                   |                                       |                            | 1                              | 1                                 | 1                                         | 1                              | 1                                              | 5                                                                 |
|                    | RBMP+PoM_Elbe_2021                                                       | 1                                 | 1                                     | 1                          | 1                              | 1                                 |                                           | 1                              | 1                                              | 7                                                                 |
|                    | RDP_Greifenhainer_Fließ_BB_2011                                          | 1                                 | 1                                     |                            |                                | 1                                 |                                           |                                |                                                | 3                                                                 |
|                    | RDP_Krumme_Spree_BB_2013                                                 | 1                                 |                                       |                            |                                | 1                                 |                                           |                                |                                                | 2                                                                 |
|                    | RDP_Spree-2_SN_2020                                                      | 1                                 |                                       |                            |                                | 1                                 |                                           |                                |                                                | 2                                                                 |
| Spatial planning   | SDP_BE-BB_2019                                                           | 1                                 | 1                                     | 1                          | 1                              | 1                                 |                                           | 1                              | 1                                              | 7                                                                 |
|                    | SDP+LaPro_SN_2013                                                        | 1                                 | 1                                     | 1                          | 1                              | 1                                 | 1                                         | 1                              | 1                                              | 8                                                                 |
|                    | RP+LaMaP_Oberlausitz-Niederschlesien_SN_2019                             | 1                                 | 1                                     | 1                          | 1                              | 1                                 | 1                                         |                                |                                                | 6                                                                 |
|                    | LUP_BE_2020                                                              |                                   |                                       |                            |                                | 1                                 |                                           | 1                              | 1                                              | 3                                                                 |
| Landscape planning | LaPro_BE_2016                                                            | 1                                 | 1                                     | 1                          |                                | 1                                 | 1                                         |                                | 1                                              | 6                                                                 |
|                    | LaMaP_Oder-Spree_BB_2021                                                 | 1                                 | 1                                     | 1                          | 1                              | 1                                 | 1                                         | 1                              | 1                                              | 8                                                                 |
|                    |                                                                          | <b>9</b>                          | <b>7</b>                              | <b>6</b>                   | <b>6</b>                       | <b>11</b>                         | <b>5</b>                                  | <b>6</b>                       | <b>7</b>                                       |                                                                   |

**Table S11. Climate change adaptation measures proposed by the plans corresponding with the climate change adaptation measures for the water management field of action "Low water management" of the Climate Change Report by the LAWA from 2020 (n = 9; 1 = climate change adaptation measure is mentioned)**

| Scope              | Plan abbreviations*<br>(plan acronym, area allocation, publication date) | Measures of the water management field of action "Low water management" |                        |                        |                                    |                                        |                                      | Total of climate change adaptation measures |
|--------------------|--------------------------------------------------------------------------|-------------------------------------------------------------------------|------------------------|------------------------|------------------------------------|----------------------------------------|--------------------------------------|---------------------------------------------|
|                    |                                                                          | Low water and temperature forecasting                                   | Water use restrictions | Ensuring water quality | Oxygen management through aeration | Artificial raising of low water levels | Creating artificial water reservoirs |                                             |
| Water management   | FRMP_Elbe_2021                                                           |                                                                         |                        |                        |                                    |                                        |                                      |                                             |
|                    | RBMP+PoM_Elbe_2021                                                       |                                                                         | 1                      | 1                      |                                    | 1                                      | 1                                    | 1                                           |
|                    | RDP_Greifenhainer_Fließ_BB_2011                                          |                                                                         |                        |                        |                                    | 1                                      |                                      | 1                                           |
|                    | RDP_Krumme_Spree_BB_2013                                                 |                                                                         | 1                      | 1                      |                                    | 1                                      |                                      |                                             |
|                    | RDP_Spree-2_SN_2020                                                      |                                                                         | 1                      | 1                      |                                    |                                        |                                      |                                             |
| Spatial planning   | SDP_BE-BB_2019                                                           |                                                                         |                        |                        |                                    |                                        |                                      | 1                                           |
|                    | SDP+LaPro_SN_2013                                                        |                                                                         | 1                      | 1                      |                                    |                                        |                                      | 1                                           |
|                    | RP+LaMaP_Oberlausitz-Niederschlesien_SN_2019                             |                                                                         | 1                      |                        |                                    |                                        |                                      | 1                                           |
|                    | LUP_BE_2020                                                              |                                                                         |                        |                        |                                    |                                        |                                      |                                             |
| Landscape planning | LaPro_BE_2016                                                            |                                                                         |                        |                        |                                    |                                        |                                      | 1                                           |
|                    | LaMaP_Oder-Spree_BB_2021                                                 |                                                                         |                        | 1                      |                                    |                                        |                                      | 1                                           |
|                    |                                                                          |                                                                         | <b>5</b>               | <b>5</b>               |                                    | <b>3</b>                               | <b>1</b>                             | <b>7</b>                                    |

\*Plan abbreviations are composed of plan acronym, area allocation and publication date. Plan acronyms are FRMP (flood risk management plan), RBMP (river basin management plan), PoM (programme of measures), RDP (river development plan), SDPro (state development programme), SDP (state development plan), RP (regional plan), LUP (land use plan), LaPro (landscape programme) and LaMaP (landscape master plan). Area allocations for water management plans are the German Elbe River basin (Elbe) or Spree River sub-basins (divers) with federal state affiliation (BB for Brandenburg, BE for Berlin, SN for Saxony). Area allocations for spatial and landscape plans refer to their respective administrative levels, either labelled with the federal state or the region/county with federal state affiliation.

**Table S12. Climate change adaptation measures proposed by the plans corresponding with the climate change adaptation measures for the water management field of action "Groundwater protection and use" of the Climate Change Report by the LAWA from 2020 (n = 7; 1 = climate change adaptation measure is mentioned)**

| Scope              | Plan abbreviations*<br>(plan acronym, area allocation, publication date) | Measures of the water management field of action "Groundwater protection and use" |                                                                   |                  |                                                                     |                                |                               | Total of climate change adaptation measures |
|--------------------|--------------------------------------------------------------------------|-----------------------------------------------------------------------------------|-------------------------------------------------------------------|------------------|---------------------------------------------------------------------|--------------------------------|-------------------------------|---------------------------------------------|
|                    |                                                                          | Climate-specific evaluation and adaptation of groundwater monitoring              | Promoting groundwater-friendly agriculture (quality and quantity) | Land use changes | Protecting groundwater-dependent terrestrial ecosystems (peatlands) | Promoting groundwater recharge | Increasing groundwater supply |                                             |
| Water management   | FRMP_Elbe_2021                                                           |                                                                                   |                                                                   |                  |                                                                     |                                |                               |                                             |
|                    | RBMP+PoM_Elbe_2021                                                       |                                                                                   | 1                                                                 | 1                | 1                                                                   | 1                              | 1                             | 6                                           |
|                    | RDP_Greifenhainer_Fließ_BB_2011                                          |                                                                                   |                                                                   |                  | 1                                                                   | 1                              |                               | 2                                           |
|                    | RDP_Krumme_Spree_BB_2013                                                 |                                                                                   |                                                                   |                  |                                                                     |                                |                               |                                             |
|                    | RDP_Spree-2_SN_2020                                                      |                                                                                   |                                                                   |                  |                                                                     |                                |                               |                                             |
| Spatial planning   | SDP_BE-BB_2019                                                           |                                                                                   |                                                                   | 1                | 1                                                                   | 1                              |                               | 3                                           |
|                    | SDP+LaPro_SN_2013                                                        |                                                                                   | 1                                                                 | 1                | 1                                                                   | 1                              | 1                             | 5                                           |
|                    | RP+LaMaP_Oberlausitz-Niederschlesien_SN_2019                             |                                                                                   | 1                                                                 | 1                | 1                                                                   | 1                              | 1                             | 5                                           |
| Landscape planning | LUP_BE_2020                                                              |                                                                                   |                                                                   |                  |                                                                     |                                |                               |                                             |
|                    | LaPro_BE_2016                                                            |                                                                                   |                                                                   |                  | 1                                                                   | 1                              |                               | 2                                           |
|                    | LaMaP_Oder-Spree_BB_2021                                                 |                                                                                   | 1                                                                 | 1                | 1                                                                   | 1                              |                               | 4                                           |
|                    |                                                                          |                                                                                   | <b>4</b>                                                          | <b>5</b>         | <b>7</b>                                                            | <b>7</b>                       | <b>1</b>                      | <b>3</b>                                    |

**Table S13. Climate change adaptation measures proposed by the plans corresponding with the climate change adaptation measures for the water management field of action "Public water supply" of the Climate Change Report by the LAWA from 2020 (n = 6; 1 = climate change adaptation measure is mentioned)**

| Scope              | Plan abbreviations*<br>(plan acronym, area allocation, publication date) | Measures of the water management field of action "Public water supply" |                                      |                      |                       |                                                 |                                   | Total of climate change adaptation measures |
|--------------------|--------------------------------------------------------------------------|------------------------------------------------------------------------|--------------------------------------|----------------------|-----------------------|-------------------------------------------------|-----------------------------------|---------------------------------------------|
|                    |                                                                          | Redundant water harvesting systems                                     | Adapting water supply infrastructure | Rainwater harvesting | Reducing water demand | Improving water quality in the pipeline network | Advanced drinking water treatment |                                             |
| Water management   | FRMP_Elbe_2021                                                           |                                                                        |                                      |                      |                       |                                                 |                                   |                                             |
|                    | RBMP+PoM_Elbe_2021                                                       | 1                                                                      | 1                                    |                      | 1                     |                                                 | 1                                 | 4                                           |
|                    | RDP_Greifenhainer_Fließ_BB_2011                                          |                                                                        |                                      |                      |                       |                                                 |                                   |                                             |
|                    | RDP_Krumme_Spree_BB_2013                                                 |                                                                        |                                      |                      |                       |                                                 |                                   |                                             |
|                    | RDP_Spree-2_SN_2020                                                      |                                                                        |                                      |                      |                       |                                                 |                                   |                                             |
| Spatial planning   | SDP_BE-BB_2019                                                           |                                                                        |                                      |                      | 1                     |                                                 | 1                                 | 2                                           |
|                    | SDP+LaPro_SN_2013                                                        |                                                                        | 1                                    |                      |                       |                                                 |                                   | 1                                           |
|                    | RP+LaMaP_Oberlausitz-Niederschlesien_SN_2019                             |                                                                        |                                      |                      |                       |                                                 | 1                                 | 1                                           |
| Landscape planning | LUP_BE_2020                                                              |                                                                        |                                      |                      |                       |                                                 |                                   |                                             |
|                    | LaPro_BE_2016                                                            |                                                                        |                                      | 1                    | 1                     |                                                 |                                   | 2                                           |
|                    | LaMaP_Oder-Spree_BB_2021                                                 |                                                                        | 1                                    |                      |                       |                                                 |                                   | 1                                           |
|                    |                                                                          | <b>1</b>                                                               | <b>3</b>                             | <b>1</b>             | <b>3</b>              |                                                 | <b>3</b>                          |                                             |

**Table S14. Climate change adaptation measures proposed by the plans corresponding with the climate change adaptation measures for the water management field of action "Agricultural irrigation" of the Climate Change Report by the LAWA from 2020 (n = 6; 1 = climate change adaptation measure is mentioned)**

| Scope              | Plan abbreviations*<br>(plan acronym, area allocation, publication date) | Measures of the water management field of action "Agricultural irrigation" |                      |                    |                            |                      |                          | Total of climate change adaptation measures |
|--------------------|--------------------------------------------------------------------------|----------------------------------------------------------------------------|----------------------|--------------------|----------------------------|----------------------|--------------------------|---------------------------------------------|
|                    |                                                                          | Soil and erosion protection                                                | Conservation tillage | Humus accumulation | Adaptations in cultivation | Efficient irrigation | Groundwater substitution |                                             |
| Water management   | FRMP_Elbe_2021                                                           | 1                                                                          | 1                    | 1                  |                            |                      |                          | 3                                           |
|                    | RBMP+PoM_Elbe_2021                                                       | 1                                                                          | 1                    | 1                  |                            |                      |                          | 3                                           |
|                    | RDP_Greifenhainer_Fließ_BB_2011                                          |                                                                            |                      |                    |                            |                      |                          |                                             |
|                    | RDP_Krumme_Spree_BB_2013                                                 |                                                                            |                      |                    |                            |                      |                          |                                             |
|                    | RDP_Spree-2_SN_2020                                                      |                                                                            |                      |                    |                            |                      |                          |                                             |
| Spatial planning   | SDP_BE-BB_2019                                                           | 1                                                                          |                      |                    |                            |                      |                          | 1                                           |
|                    | SDP+LaPro_SN_2013                                                        | 1                                                                          | 1                    | 1                  |                            |                      |                          | 3                                           |
|                    | RP+LaMaP_Oberlausitz-Niederschlesien_SN_2019                             | 1                                                                          | 1                    | 1                  |                            |                      |                          | 3                                           |
| Landscape planning | LUP_BE_2020                                                              |                                                                            |                      |                    |                            |                      |                          |                                             |
|                    | LaPro_BE_2016                                                            |                                                                            |                      |                    |                            |                      |                          |                                             |
|                    | LaMaP_Oder-Spree_BB_2021                                                 | 1                                                                          |                      |                    | 1                          | 1                    |                          | 3                                           |
|                    |                                                                          | <b>6</b>                                                                   | <b>4</b>             | <b>4</b>           | <b>1</b>                   | <b>1</b>             |                          |                                             |

\*Plan abbreviations are composed of plan acronym, area allocation and publication date. Plan acronyms are FRMP (flood risk management plan), RBMP (river basin management plan), PoM (programme of measures), RDP (river development plan), SDPro (state development programme), SDP (state development plan), RP (regional plan), LUP (land use plan), LaPro (landscape programme) and LaMaP (landscape master plan). Area allocations for water management plans are the German Elbe River basin (Elbe) or Spree River sub-basins (divers) with federal state affiliation (BB for Brandenburg, BE for Berlin, SN for Saxony). Area allocations for spatial and landscape plans refer to their respective administrative levels, either labelled with the federal state or the region/county with federal state affiliation.

**Table S15. Climate change adaptation measures proposed by the plans corresponding with the climate change adaptation measures for the water management field of action "Water ecosystem protection" of the Climate Change Report by the LAWA from 2020 (n = 11; 1 = climate change adaptation measure is mentioned)**

| Scope              | Plan abbreviations*<br>(plan acronym, area allocation, publication date) | Measures of the water management field of action "Water ecosystem protection" |                                            |                                           |                                   |                                           |                                                                    |                                                      |                                                     |                               |                                                                | Total of climate change adaptation measures |
|--------------------|--------------------------------------------------------------------------|-------------------------------------------------------------------------------|--------------------------------------------|-------------------------------------------|-----------------------------------|-------------------------------------------|--------------------------------------------------------------------|------------------------------------------------------|-----------------------------------------------------|-------------------------------|----------------------------------------------------------------|---------------------------------------------|
|                    |                                                                          | Improving continuity of flowing waters                                        | Variation of hydromorphological structures | Protecting and developing riparian strips | Installing sedimentation barriers | Nature-conserving watercourse maintenance | Conservation and expansion of protected areas and biotope networks | Reducing diffuse pollutant entry and nutrient inputs | Adapting abstraction and discharge threshold values | Water quality warning service | Climate-specific adaptation and evaluation of water monitoring |                                             |
| Water management   | FRMP_Elbe_2021                                                           |                                                                               | 1                                          | 1                                         | 1                                 | 1                                         |                                                                    |                                                      |                                                     |                               |                                                                | 4                                           |
|                    | RBMP+PoM_Elbe_2021                                                       | 1                                                                             | 1                                          | 1                                         | 1                                 | 1                                         | 1                                                                  | 1                                                    | 1                                                   |                               |                                                                | 8                                           |
|                    | RDP_Greifenhainer_Fließ_BB_2011                                          |                                                                               | 1                                          |                                           |                                   |                                           |                                                                    |                                                      |                                                     |                               |                                                                | 1                                           |
|                    | RDP_Krumme_Spree_BB_2013                                                 |                                                                               | 1                                          |                                           |                                   |                                           |                                                                    |                                                      |                                                     |                               |                                                                | 1                                           |
|                    | RDP_Spree-2_SN_2020                                                      |                                                                               | 1                                          |                                           |                                   |                                           |                                                                    | 1                                                    | 1                                                   |                               | 1                                                              | 4                                           |
| Spatial planning   | SDP_BE-BB_2019                                                           |                                                                               |                                            |                                           |                                   |                                           |                                                                    |                                                      | 1                                                   |                               |                                                                | 1                                           |
|                    | SDP+LaPro_SN_2013                                                        |                                                                               | 1                                          |                                           |                                   |                                           |                                                                    |                                                      | 1                                                   |                               | 1                                                              | 3                                           |
|                    | RP+LaMaP_Oberlausitz-Niederschlesien_SN_2019                             |                                                                               | 1                                          | 1                                         | 1                                 |                                           |                                                                    | 1                                                    |                                                     | 1                             |                                                                | 6                                           |
|                    | LUP_BE_2020                                                              |                                                                               |                                            |                                           |                                   |                                           |                                                                    |                                                      | 1                                                   |                               |                                                                | 1                                           |
| Landscape planning | LaPro_BE_2016                                                            |                                                                               | 1                                          |                                           |                                   |                                           |                                                                    |                                                      | 1                                                   |                               |                                                                | 2                                           |
|                    | LaMaP_Oder-Spree_BB_2021                                                 |                                                                               |                                            |                                           | 1                                 |                                           |                                                                    | 1                                                    |                                                     |                               |                                                                | 2                                           |
|                    |                                                                          | <b>1</b>                                                                      | <b>8</b>                                   | <b>3</b>                                  | <b>4</b>                          | <b>2</b>                                  | <b>6</b>                                                           | <b>4</b>                                             | <b>4</b>                                            | <b>1</b>                      |                                                                |                                             |

**Table S16. Climate change adaptation measures proposed by the plans corresponding with the climate change adaptation measures for the water management field of action "Flood protection during heavy rain" of the Climate Change Report by the LAWA from 2020 (n = 5; 1 = climate change adaptation measure is mentioned)**

| Scope              | Plan abbreviations*<br>(plan acronym, area allocation, publication date) | Measures of the water management field of action "Flood protection during heavy rain" |                                               |                                         |                                                                          |                                                                                          |                                                            |                                                               | Total of climate change adaptation measures |
|--------------------|--------------------------------------------------------------------------|---------------------------------------------------------------------------------------|-----------------------------------------------|-----------------------------------------|--------------------------------------------------------------------------|------------------------------------------------------------------------------------------|------------------------------------------------------------|---------------------------------------------------------------|---------------------------------------------|
|                    |                                                                          | Retention through changes in forest management                                        | Establishing and securing emergency waterways | Object protection in case of flood risk | Organised measures in case of extreme rainfall and flash flooding events | Behavioural precautions and training in the event of extreme rainfall and flash flooding | Regular maintenance and inspection of the drainage systems | Flood risk assessment (e.g., heavy rain hazard and risk maps) |                                             |
| Water management   | FRMP_Elbe_2021                                                           |                                                                                       |                                               |                                         |                                                                          | 1                                                                                        | 1                                                          | 1                                                             | 3                                           |
|                    | RBMP+PoM_Elbe_2021                                                       |                                                                                       |                                               |                                         |                                                                          |                                                                                          |                                                            |                                                               |                                             |
|                    | RDP_Greifenhainer_Fließ_BB_2011                                          |                                                                                       |                                               |                                         |                                                                          |                                                                                          |                                                            |                                                               |                                             |
|                    | RDP_Krumme_Spree_BB_2013                                                 |                                                                                       |                                               |                                         |                                                                          |                                                                                          |                                                            |                                                               |                                             |
|                    | RDP_Spree-2_SN_2020                                                      |                                                                                       |                                               |                                         |                                                                          |                                                                                          |                                                            |                                                               |                                             |
| Spatial planning   | SDP_BE-BB_2019                                                           |                                                                                       |                                               |                                         | 1                                                                        | 1                                                                                        |                                                            |                                                               | 3                                           |
|                    | SDP+LaPro_SN_2013                                                        | 1                                                                                     |                                               |                                         |                                                                          |                                                                                          |                                                            |                                                               | 1                                           |
|                    | RP+LaMaP_Oberlausitz-Niederschlesien_SN_2019                             | 1                                                                                     |                                               |                                         |                                                                          |                                                                                          |                                                            |                                                               | 1                                           |
| Landscape planning | LUP_BE_2020                                                              |                                                                                       |                                               |                                         |                                                                          |                                                                                          |                                                            |                                                               |                                             |
|                    | LaPro_BE_2016                                                            | 1                                                                                     |                                               |                                         |                                                                          |                                                                                          |                                                            |                                                               | 1                                           |
| Landscape planning | LaMaP_Oder-Spree_BB_2021                                                 |                                                                                       |                                               | 1                                       |                                                                          | 1                                                                                        |                                                            |                                                               | 2                                           |
|                    |                                                                          |                                                                                       | <b>3</b>                                      |                                         | <b>1</b>                                                                 | <b>1</b>                                                                                 | <b>3</b>                                                   | <b>1</b>                                                      | <b>1</b>                                    |

\*Plan abbreviations are composed of plan acronym, area allocation and publication date. Plan acronyms are FRMP (flood risk management plan), RBMP (river basin management plan), PoM (programme of measures), RDP (river development plan), SDPro (state development programme), SDP (state development plan), RP (regional plan), LUP (land use plan), LaPro (landscape programme) and LaMaP (landscape master plan). Area allocations for water management plans are the German Elbe River basin (Elbe) or Spree River sub-basins (divers) with federal state affiliation (BB for Brandenburg, BE for Berlin, SN for Saxony). Area allocations for spatial and landscape plans refer to their respective administrative levels, either labelled with the federal state or the region/county with federal state affiliation.

**Table S17. Climate change adaptation measures proposed by the plans corresponding with the climate change adaptation measures for the water management field of action "Inland flood protection" of the Climate Change Report by the LAWA from 2020 (n = 6; 1 = climate change adaptation measure is mentioned)**

| Scope              | Plan abbreviations*<br>(plan acronym, area allocation, publication date) | Measures of the water management field of action "Inland flood protection" |                                                          |                                                               |                                                                  |                                                         |                            |                                                                     |                                                                      |                    |                                                             | Total of climate change adaptation measures |
|--------------------|--------------------------------------------------------------------------|----------------------------------------------------------------------------|----------------------------------------------------------|---------------------------------------------------------------|------------------------------------------------------------------|---------------------------------------------------------|----------------------------|---------------------------------------------------------------------|----------------------------------------------------------------------|--------------------|-------------------------------------------------------------|---------------------------------------------|
|                    |                                                                          | Technical flood protection                                                 | Recovery of flood plains and renaturation of floodplains | Activating additional and optimising existing retention areas | Land use regulations in flood plains / areas at risk of flooding | Designation of "Vorranggebiet" and "Vorbehaltsgeländen" | Flood hazard and risk maps | Identifying and mapping areas at risk of waterlogging (groundwater) | Property protection in the event of damaging high groundwater levels | Flood partnerships | Organised measures in case of extreme inland flooding event |                                             |
| Water management   | FRMP_Elbe_2021                                                           | 1                                                                          | 1                                                        | 1                                                             | 1                                                                | 1                                                       | 1                          | 1                                                                   | 1                                                                    | 1                  | 1                                                           | 10                                          |
|                    | RBMP+PoM_Elbe_2021                                                       |                                                                            | 1                                                        | 1                                                             |                                                                  |                                                         |                            |                                                                     |                                                                      |                    |                                                             | 2                                           |
|                    | RDP_Greifenhainer_Fließ_BB_2011                                          |                                                                            |                                                          |                                                               |                                                                  |                                                         |                            |                                                                     |                                                                      |                    |                                                             |                                             |
|                    | RDP_Krumme_Spree_BB_2013                                                 |                                                                            |                                                          |                                                               |                                                                  |                                                         |                            |                                                                     |                                                                      |                    |                                                             |                                             |
|                    | RDP_Spree-2_SN_2020                                                      |                                                                            |                                                          |                                                               |                                                                  |                                                         |                            |                                                                     |                                                                      |                    |                                                             |                                             |
| Spatial planning   | SDP_BE-BB_2019                                                           | 1                                                                          | 1                                                        | 1                                                             | 1                                                                |                                                         | 1                          |                                                                     |                                                                      | 1                  |                                                             | 7                                           |
|                    | SDP+LaPro_SN_2013                                                        | 1                                                                          | 1                                                        | 1                                                             |                                                                  |                                                         |                            |                                                                     |                                                                      | 1                  |                                                             | 5                                           |
|                    | RP+LaMaP_Oberlausitz-Niederschlesien_SN_2019                             |                                                                            |                                                          |                                                               |                                                                  |                                                         |                            |                                                                     |                                                                      |                    |                                                             |                                             |
| Landscape planning | LUP_BE_2020                                                              | 1                                                                          |                                                          |                                                               | 1                                                                |                                                         | 1                          |                                                                     |                                                                      |                    |                                                             | 3                                           |
|                    | LaPro_BE_2016                                                            | 1                                                                          | 1                                                        | 1                                                             | 1                                                                |                                                         | 1                          |                                                                     | 1                                                                    |                    | 1                                                           | 7                                           |
|                    | LaMaP_Oder-Spree_BB_2021                                                 | 1                                                                          | 1                                                        | 1                                                             | 1                                                                |                                                         | 1                          |                                                                     | 1                                                                    |                    | 1                                                           | 7                                           |
|                    |                                                                          | <b>5</b>                                                                   | <b>5</b>                                                 | <b>5</b>                                                      | <b>4</b>                                                         | <b>1</b>                                                | <b>4</b>                   |                                                                     | <b>2</b>                                                             | <b>2</b>           | <b>2</b>                                                    | <b>4</b>                                    |

**Table S18. Climate change adaptation measures proposed by the plans corresponding with the climate change adaptation measures for the water management field of action "Urban drainage and wastewater treatment" of the Climate Change Report by the LAWA from 2020 (n = 7; 1 = climate change adaptation measure is mentioned)**

| Scope              | Plan abbreviations*<br>(plan acronym, area allocation, publication date) | Measures of the water management field of action "Urban drainage and wastewater treatment" |                                          |                                                 |                                |                                    |                                     |                                              | Total of climate change adaptation measures |
|--------------------|--------------------------------------------------------------------------|--------------------------------------------------------------------------------------------|------------------------------------------|-------------------------------------------------|--------------------------------|------------------------------------|-------------------------------------|----------------------------------------------|---------------------------------------------|
|                    |                                                                          | Optimising the construction and operation of existing sewer systems                        | Adapting wastewater treatment operations | Installations for precipitation water treatment | Water retention in urban areas | Exploiting infiltration potentials | Incentives for rainwater management | Protecting wastewater facilities from floods |                                             |
| Water management   | FRMP_Elbe_2021                                                           |                                                                                            |                                          |                                                 | 1                              | 1                                  |                                     |                                              | 2                                           |
|                    | RBMP+PoM_Elbe_2021                                                       | 1                                                                                          | 1                                        | 1                                               |                                | 1                                  |                                     | 4                                            |                                             |
|                    | RDP_Greifenhainer_Fließ_BB_2011                                          |                                                                                            |                                          |                                                 |                                |                                    |                                     |                                              |                                             |
|                    | RDP_Krumme_Spree_BB_2013                                                 |                                                                                            |                                          |                                                 |                                |                                    |                                     |                                              |                                             |
|                    | RDP_Spree-2_SN_2020                                                      |                                                                                            |                                          |                                                 |                                |                                    |                                     |                                              |                                             |
| Spatial planning   | SDP_BE-BB_2019                                                           |                                                                                            |                                          |                                                 |                                | 1                                  |                                     | 1                                            |                                             |
|                    | SDP+LaPro_SN_2013                                                        |                                                                                            |                                          |                                                 | 1                              | 1                                  |                                     | 2                                            |                                             |
|                    | RP+LaMaP_Oberlausitz-Niederschlesien_SN_2019                             |                                                                                            |                                          |                                                 |                                |                                    |                                     |                                              |                                             |
| Landscape planning | LUP_BE_2020                                                              |                                                                                            |                                          |                                                 | 1                              | 1                                  |                                     | 2                                            |                                             |
|                    | LaPro_BE_2016                                                            | 1                                                                                          |                                          |                                                 | 1                              | 1                                  |                                     | 3                                            |                                             |
|                    | LaMaP_Oder-Spree_BB_2021                                                 | 1                                                                                          |                                          |                                                 |                                | 1                                  | 1                                   | 3                                            |                                             |
|                    |                                                                          | <b>3</b>                                                                                   | <b>1</b>                                 | <b>1</b>                                        | <b>4</b>                       | <b>7</b>                           | <b>1</b>                            |                                              |                                             |

\*Plan abbreviations are composed of plan acronym, area allocation and publication date. Plan acronyms are FRMP (flood risk management plan), RBMP (river basin management plan), PoM (programme of measures), RDP (river development plan), SDPro (state development programme), SDP (state development plan), RP (regional plan), LUP (land use plan), LaPro (landscape programme) and LaMaP (landscape master plan). Area allocations for water management plans are the German Elbe River basin (Elbe) or Spree River sub-basins (divers) with federal state affiliation (BB for Brandenburg, BE for Berlin, SN for Saxony). Area allocations for spatial and landscape plans refer to their respective administrative levels, either labelled with the federal state or the region/county with federal state affiliation.

**Table S19. Map data references.**

| <b>Data theme</b>                                                                                         | <b>Publisher</b>                                                      | <b>Year of publication</b> | <b>Product title</b>                                                                                                           | <b>Link for download (last access: 3 December 2024)</b>                                                                                                                                                                                                                                                                                                                                                                                                                                                                       |
|-----------------------------------------------------------------------------------------------------------|-----------------------------------------------------------------------|----------------------------|--------------------------------------------------------------------------------------------------------------------------------|-------------------------------------------------------------------------------------------------------------------------------------------------------------------------------------------------------------------------------------------------------------------------------------------------------------------------------------------------------------------------------------------------------------------------------------------------------------------------------------------------------------------------------|
| Base map                                                                                                  | Esri, Maxar, Earthstar Geographics, and the GIS User Community        | 2024                       | World Imagery (*in grey shading)                                                                                               | Download:<br><a href="https://services.arcgisonline.com/arcgis/rest/services/World_Imagery/MapServer/WMTS/1.0.0/WMTSCapabilities.xml">https://services.arcgisonline.com/arcgis/rest/services/World_Imagery/MapServer/WMTS/1.0.0/WMTSCapabilities.xml</a>                                                                                                                                                                                                                                                                      |
| State boundaries                                                                                          | EC/ESTAT/GISCO – European Commission, Eurostat (ESTAT), GISCO         | 2020                       | Local Administrative Units 2019                                                                                                | <a href="https://gisco-services.ec.europa.eu/distribution/v2/countries/">https://gisco-services.ec.europa.eu/distribution/v2/countries/</a>                                                                                                                                                                                                                                                                                                                                                                                   |
| Federal state boundaries                                                                                  | BKG – Bundesamt für Kartographie und Geodäsie                         | 2009                       | WFS Verwaltungsgebiete 1:250 000 (Bundesland)                                                                                  | <a href="https://geoportal.de/Metadaten/cf95dc-81b9-4704-a61c-d71070d15fd3">https://geoportal.de/Metadaten/cf95dc-81b9-4704-a61c-d71070d15fd3</a><br>Download:<br><a href="https://sgx.geodatenzentrum.de/wfs_vg250?SERVICE=WFS&amp;Request=GetCapabilities">https://sgx.geodatenzentrum.de/wfs_vg250?SERVICE=WFS&amp;Request=GetCapabilities</a>                                                                                                                                                                             |
| County/Region boundaries in Brandenburg and Saxony (Oder-Spree, Spree-Neiße, Oberlausitz-Niederschlesien) | BKG – Bundesamt für Kartographie und Geodäsie                         | 2009                       | WFS Verwaltungsgebiete 1:250 000 (Verwaltungsgebiete, Kreis)                                                                   | <a href="https://geoportal.de/Metadaten/cf95dc-81b9-4704-a61c-d71070d15fd3">https://geoportal.de/Metadaten/cf95dc-81b9-4704-a61c-d71070d15fd3</a><br>Download:<br><a href="https://sgx.geodatenzentrum.de/wfs_vg250?SERVICE=WFS&amp;Request=GetCapabilities">https://sgx.geodatenzentrum.de/wfs_vg250?SERVICE=WFS&amp;Request=GetCapabilities</a>                                                                                                                                                                             |
| German Elbe river basin                                                                                   | WasserBLiK-/BfG & Zuständige Behörden der Länder                      | 2016                       | Einzugsgebietsgrenzen-DE                                                                                                       | <a href="https://geoportal.bafg.de/download/opendata/einzugsgebietsgrenzen/einzugsgebiete/datasetfeed.xml">https://geoportal.bafg.de/download/opendata/einzugsgebietsgrenzen/einzugsgebiete/datasetfeed.xml</a>                                                                                                                                                                                                                                                                                                               |
| Coordination area “Havel”                                                                                 | WasserBLiK-/BfG & Zuständige Behörden der Länder                      | 2016                       | Einzugsgebietsgrenzen-DE                                                                                                       | <a href="https://geoportal.bafg.de/download/opendata/einzugsgebietsgrenzen/einzugsgebiete/datasetfeed.xml">https://geoportal.bafg.de/download/opendata/einzugsgebietsgrenzen/einzugsgebiete/datasetfeed.xml</a>                                                                                                                                                                                                                                                                                                               |
| Spree river basin                                                                                         | WasserBLiK-/BfG & Zuständige Behörden der Länder                      | 2016                       | Einzugsgebietsgrenzen-DE                                                                                                       | <a href="https://geoportal.bafg.de/download/opendata/einzugsgebietsgrenzen/einzugsgebiete/datasetfeed.xml">https://geoportal.bafg.de/download/opendata/einzugsgebietsgrenzen/einzugsgebiete/datasetfeed.xml</a>                                                                                                                                                                                                                                                                                                               |
| Spree river sub-basins in Saxony                                                                          | LfULG – Sächsisches Landesamt für Umwelt, Landwirtschaft und Geologie | 2021                       | WFS - WRRL: Messstellen zur Bewertung des Zustandes der Oberflächengewässerkörper 2022-2027                                    | <a href="https://geoportal.de/Metadaten/2cbf68cb-0096-4012-a31d-b0784888d138">https://geoportal.de/Metadaten/2cbf68cb-0096-4012-a31d-b0784888d138</a><br>Download:<br><a href="https://geoportal.umwelt.sachsen.de/arcgis/services/wasser/wrrlmesstellenowk_22_27/MapServer/WFSServer">https://geoportal.umwelt.sachsen.de/arcgis/services/wasser/wrrlmesstellenowk_22_27/MapServer/WFSServer</a>                                                                                                                             |
| Spree river sub-basins in Brandenburg                                                                     | LfU – Landesamt für Umwelt Brandenburg                                | 2014                       | Gebiete der Gewässerentwicklungskonzepte nach WRRL im Land Brandenburg (Einzugsgebiete der Oberflächengewässerkörper)          | <a href="https://geoportal.de/Metadaten/2C462EAF-DB2A-45F3-A3B0-92F4E9A92532">https://geoportal.de/Metadaten/2C462EAF-DB2A-45F3-A3B0-92F4E9A92532</a><br>Download:<br><a href="https://data.geobasis-bb.de/geofachdaten/Wasser/WRRL/wrrl_gek.zip">https://data.geobasis-bb.de/geofachdaten/Wasser/WRRL/wrrl_gek.zip</a>                                                                                                                                                                                                       |
| Spree river in Brandenburg                                                                                | LfU – Landesamt für Umwelt Brandenburg                                | 2024                       | Wasserrahmenrichtlinie Daten zum Entwurf 3. Bewirtschaftungszyklus 2020 – Datensammlung (Fließgewässerkörper, Seewässerkörper) | <a href="https://geoportal.brandenburg.de/detailansichtdienst/render?view=gdibb&amp;url=https://geoportal.brandenburg.de/gson/xml?fileid=DE9CDB3B-3EF3-4E73-8CE8-81481E3DB01D#">https://geoportal.brandenburg.de/detailansichtdienst/render?view=gdibb&amp;url=https://geoportal.brandenburg.de/gson/xml?fileid=DE9CDB3B-3EF3-4E73-8CE8-81481E3DB01D#</a><br>Download:<br><a href="https://data.geobasis-bb.de/geofachdaten/Wasser/WRRL/wrrl_2020.zip">https://data.geobasis-bb.de/geofachdaten/Wasser/WRRL/wrrl_2020.zip</a> |
| Spree river in Saxony                                                                                     | LfULG – Sächsisches Landesamt für Umwelt, Landwirtschaft und Geologie | 2021                       | WFS - WRRL: Messstellen zur Bewertung des Zustandes der Oberflächengewässerkörper 2022-2027 (Standgewässer, Fließgewässer)     | <a href="https://geoportal.de/Metadaten/2cbf68cb-0096-4012-a31d-b0784888d138">https://geoportal.de/Metadaten/2cbf68cb-0096-4012-a31d-b0784888d138</a><br>Download:<br><a href="https://geoportal.umwelt.sachsen.de/arcgis/services/wasser/wrrlmesstellenowk_22_27/MapServer/WFSServer">https://geoportal.umwelt.sachsen.de/arcgis/services/wasser/wrrlmesstellenowk_22_27/MapServer/WFSServer</a>                                                                                                                             |
